# Supplementary material for: The Effect of Probiotic Supplementation on Gastro-intestinal Symptoms and Mood States in Unprofessional Bodybuilders: A Randomized, Double Blind, Placebo-Controlled Clinical Trial Study
Source: Research Square preprint supplement (doi:10.21203/rs.3.rs-7147381/v1), 2025-09-24
Supplement: Supplementary file 1 [file 3677d15ff379fcb76db17f67.docx]

**Consent Form for Participation in the Study of the Effects of Probiotic Supplementation on Body Composition, Gastrointestinal Symptoms, Mood Status, and Performance in Unprofessional Athletes: A Clinical Trial**

**Dear Sir/Madam,**

**You are hereby invited to participate in the aforementioned research. Information regarding this study is provided on this form, and you are free to decide whether or not to participate. You are not required to make an immediate decision; you may ask questions of the research team and consult with anyone you wish before deciding. Please ensure that you understand all the information in this form and that all your questions have been answered before signing this consent form.**

**Researchers**: Nastaran Mahmoudi Shirkoohi, Dr. Kurosh Djafarian

1. **I understand that the objectives of this research are:**
   To evaluate the effects of probiotic supplementation on body composition, gastrointestinal symptoms, mood status, and performance in unprofessional athletes.
2. **I understand that** my participation in this research is completely voluntary and that I am not obligated to participate. I have been assured that if I choose not to participate, I will not be deprived of my regular sports training, and my relationship with my coach and club officials will not be affected.
3. **I am aware that** even after agreeing to participate in the research, I can withdraw at any time after informing the researchers, and my withdrawal will not prevent me from continuing my regular sports training.
4. **My cooperation in this study will be as follows:**
   Participants will be divided into two groups randomly. At the beginning and end of this 12-week study, I will answer questions regarding my characteristics, physical activity, gastrointestinal symptoms, and mood status. Additionally, I will report my dietary intake at the beginning, the end of week six, and the end of week twelve. My weight, body composition analysis, muscle strength, and performance capacity will be measured at the beginning and end of the study. If I am assigned to the intervention group, I will take a probiotic supplement (a probiotic cocktail including Lactobacillus acidophilus, Lactobacillus paracasei, and Lactobacillus plantarum) in a daily oral dose of 10^9 × 2, produced by Tak Gene Company. If assigned to the control group, I will take a placebo that is identical in appearance and color to the probiotic supplement at the same dosage of 10^9 × 2, orally. During my participation in this study, I will follow the researcher’s recommendations to avoid consuming fermented foods. All information collected from me and my name will remain confidential (in writing), and the results of the research will be published as general outcomes of the study group, with individual results presented without identifying details. The researcher has answered all my questions, and I hereby give my consent to participate in this study, noting that this consent does not preclude legal action in the event of unethical practices or inhumane treatment. The researcher explained to me that the performance capacity test will include an anaerobic sprint test, and my body composition and muscle strength will be assessed using credible devices.
5. **The potential benefits of my participation in this study are as follows:**
   1. Improvement in athlete performance, reduction of gastrointestinal symptoms affecting exercise (diarrhea, constipation, bloating, etc.), improvement in mood status, increase in muscle strength, weight loss, and reduction of body fat percentage.
   2. Free body composition testing and other athletic tests before and after the study.
   3. Free receipt of probiotic supplements.
6. **Potential Injuries and Side Effects of Participating in This Study:**
   There will be no injuries to participants in this research.
7. **If I Choose Not to Participate:**
   A standard treatment method will be provided to me, with the following benefits and side effects:
   1. Side Effects of the Standard Method: Due to the common use of unauthorized supplements among athletes, especially in bodybuilding, athletes may seek out illegal supplements from herbal shops, online stores, etc., to improve their body composition, gastrointestinal issues, mood status, and performance capacity, which can threaten their health and performance.
   2. Benefits of the Standard Method: Accessibility.
8. **Confidentiality of Information:**
   I understand that the researchers will keep all information related to me confidential and may only publish general and group results of this research without mentioning my name or personal details.
9. **Ethics Committee Oversight:**
   I am aware that the research ethics committee has the authority to access my information to ensure that my rights are respected.
10. **No Costs for Research Interventions:**
    I understand that no costs associated with the research interventions outlined below will be my responsibility. All expenses related to this study's interventions, including personnel costs, data analysis, reproduction of documents, etc., will be covered by the project researchers.
11. **Contact Person:**
    Ms. Nastaran Mahmoudi Shirkoohi has been designated as my point of contact for any questions or issues I might have regarding my participation in the aforementioned research. I have been provided with her address and phone numbers:

- address .......................................................................................................................................................
- Phone:09381432063

1. **Responsibility for Treatment of Issues Arising from Participation:**
   I understand that if I experience any physical or psychological issues during or after the research due to my participation, the responsibility for treatment, associated costs, and any compensation will fall on the researchers.
2. **Contacting the Ethics Committee**:
   I know that if I have any concerns or complaints regarding the researchers or the conduct of the study, I can contact the Ethics Committee of Tehran University of Medical Sciences at the address: Tehran, intersection of Keshavarz Boulevard and Qods Street, Central Headquarters Building of Tehran University of Medical Sciences, 6th floor, Research and Technology Affairs Management, Ethics Committee Secretariat, phone numbers 81633626 and 81633613 to present my issue verbally or in writing.
3. **Versions of the Consent Form**:
   This information and informed consent form has been prepared in two copies, and after signing, one copy will be given to me, and the other will be kept by the researcher.

I have read and understood the above statements and, based on them, I give my informed consent to participate in this study.

**Signature of the Participant**:
