# Supplementary material for: The Effect of Probiotic Supplementation on Gastro-intestinal Symptoms and Mood States in Unprofessional Bodybuilders: A Randomized, Double Blind, Placebo-Controlled Clinical Trial Study
Source: Research Square preprint supplement (doi:10.21203/rs.3.rs-7147381/v1), 2025-09-24
Supplement: Supplementary file 2 [file 90b768b1e458df737558e166.docx]

**Table1. Baseline characteristics of the study participants**

| **Variables** | **Probiotic**  **(n=20)** | | **Placebo**  **(n=20)** | | **P-Valuea** |
| --- | --- | --- | --- | --- | --- |
| **Sex, n (%)** |  | |  | |  |
| Male | 11 (55%) | | 11 (55%) | | 52.0 |
| Female | 9 (45%) | | 9 (45%) | |  |
| **Age (years)** | 29.65 ± 7.68 | | 28.10 ± 6.96 | | 0.50 |
| **Weight (kg)** | 72.96 ± 21.84 | | 71.28 ± 12.20 | | 0.76 |
| **Height (cm)** | 174.25 ± 11.78 | | 171 ± 7.69 | | 0.30 |
| **BMI (kg/m2)** | 23.47 ± 4.73 | | 24.32 ± 3.46 | | 0.51 |
| **WC (cm)** | 88.05 ± 17.43 | | 85.25 ± 9.85 | | 0.96 |
| **WHR** | 0.85 ± 0.05 | | 0.83 ± 0.06 | | 040b |
| **Fat mass (kg)** | 15.56 ± 6.68 | | 14.48 ± 4.59 | | 0.95b |
| **Fat free mass (kg)** | 57.40 ± 16.29 | | 56.79 ± 9.47 | | 0.88 |
| **Job status, n (%)** |  |  | |
| Employee | 7 (35%) | | 4 (20%) | | 0.46c |
| Student | 7 (35%) | | 10 (50%) | |  |
| Self-employment | 6 (40%) | | 6 (40%) | |  |
| **Education, n (%)** |  |  | |
| Under diploma | 5 (25%) | | 3 (15%) | | 0.52c |
| diploma | 7 (35%) | | 8 (40%) | |  |
| collegiate | 8 (50%) | | 9 (45%) | |  |
| **History of bodybuilding (month)** | 15 ± 17.55 | | 14 ± 13.48 | | 0.82b |
| **Average training (hour/week)** | 7.55 ± 1.23 | | 7.10 ± 1.37 | | 0.21b |

Notes: BMI; body mass index, WC;Waist circumference, WHR;Waist to hip ratio

1. Quantitative information was obtained based on the mean ± standard deviation and p-values ​​obtained for data

with normal distribution (pvaluea) and non-normal distribution (pvalueb) from Independent T Test and Mann Whitney Test analysis, respectively.

1. Qualitative data were reported based on numbers and percentages, and the P-valuec was obtained using the Chi-Square Test.
